# Supplementary material
Source: MDPI journal article supplement (https://www.mdpi.com/2076-3263/3/2/240)
Supplement: s1 [file s1]

## Sheet: General
			APPENDIX 1. CHARACTERISTICS of MAJOR PALEO and MESOPROTEROZOIC OROGENS
											Tectonic Settings Represented						Juvenile Continental Crust
	Onset subduction (Ma)	Onset collision (Ma)	Termination collision (Ma)	Subduction Duration (My)	Collision duration (My)	Remnants of Archean crust (Ma)	Area (km2)	crustal thickness (km)	volume preserved (km3)	volume preserved per subduction duration window (km3/y)	cont arc	oceanic arc	Reworked Components (incl sediments)	microcraton	LIP and OIB	oceanic crust (incl. serpentinites, pelagic sediments)	continental arc	oceanic arc	Reworked Components	microcraton	LIP and OIB	oceanic crust (incl. serpentinites, pelagic sediments)	Total Fraction Juvenile	volume juvenile (km3)	juvenile volume preserved per subduction duration window (km3/y)	Fraction recycled	fraction of juvenile crust with age ≤ 200 My of collision age	volume of juvenile with age ≤ 200 My of collision age (km3)	Notes	juvenile crust ocean basin closing stage (km3)	juvenile crust collision stage (km3)	fraction subduction stage	fraction collision stage	References
Borborema	2450	2350	2300	100	50		50000	40	2000000	0.02	0.7	0.1	0.2	0	0	0	0.35	0.09	0	0	0	0	0.44	880000	0.0088	0.56	0.7	616000		586667	293333	0.293333	0.146667	Macambira et al 2009 Jour S American Earth Sciences 27: 235-246; Santos et al 2009 Geol Society London Spec Public 323: 271-281
Luizian	2350	2100	2000	250	100		110000	40	4400000	0.0176	0.8	0	0.2	0	0	0	0.4	0	0	0	0	0	0.4	1760000	0.00704	0.6	0.9	1584000	earlier granulite facies metamorphism at 2350 Ma (?)	1.25714e+06	502857	0.285714	0.114286	Goscombe et al 1994 Jour. African Earth Sciences 19: 199-224; Feybesse et al 1998 Precambrian Res. 87: 161-216
West Congo	2335	2100	2000	235	100	2600-2500	129900	40	5196000	0.0221106	0.8	0	0.2	0	0	0	0.4	0	0	0	0	0	0.4	2078400	0.00884426	0.6	0.9	1870560	closure at 2 Ga collision with Sao Franciso craton	1.45798e+06	620418	0.280597	0.119403	Goscombe et al 1994 Jour. African Earth Sciences 19: 199-224; Feybesse et al 1998 Precambrian Res. 87: 161-216
Birimian-Transamazonian	2200	2100	2050	100	50	3400-2630	1000000	40	40000000	0.4	0.55	0.1	0.15	0	0.1	0.1	0.275	0.09	0	0	0.09	0.09	0.545	21800000	0.218	0.455	1	21800000		1.45333e+07	7.26667e+06	0.363333	0.181667	Ganne et al 2012 Nature Geoscience 5: 60-65; Boher et al 1992 Jour Geophys Research 97: 345-369; Gasquet et al 2003 Precamb Res 127: 329-543
Limpopo	2080	2060	1940	20	120	3300-2555	200000	40	8000000	0.4	0.1	0	0.8	0	0	0	0.05	0	0	0	0	0	0.05	400000	0.02	0.95	1	400000		57142.9	342857	0.00714286	0.0428571	Zeh et al 2007 Jour Petrology 48: 1605-1639; Kramers/Mouri 2011 Geol Soc America Memoir 207: 85-106
Volga-Don (Pachelma)	2100	2050	2000	50	50		300000	35	10500000	0.21	0.8	0	0.2	0	0	0	0.4	0	0	0	0	0	0.4	4200000	0.084	0.6	0.6	2520000		2100000	2100000	0.2	0.2	Bogdanova et al 1996 Tectonophysics 268: 1-21; Bibikova et al 2009 Statigraphy & Geological Correlation 17: 561-573; Shchipansky et al 2007 Geotectonics 41: 38-62
Eburnean	2100	2050	1990	50	60	3400-2400	925000	40	37000000	0.74	0.3	0	0.4	0.3	0	0	0.15	0	0	0	0	0	0.15	5550000	0.111	0.85	0.9	4995000		2.52273e+06	3.02727e+06	0.0681818	0.0818182	Santos et al 2000 Gondwana Res 3: 453-488; Lerouge et al 2006 Jour African Earth Sciences 44: 413-427
Magondi-Kheis	2200	2040	1960	160	80	3015-2700	409530	40	16381200	0.102383	0.75	0	0.25	0	0	0	0.375	0	0	0	0	0	0.375	6142950	0.0383934	0.625	0.85	5.22151e+06	merges with Limpopo in N Botswana	4095300	2047650	0.25	0.125	Majaule et al 2001 Jour African Earth Sciences 32: 257-267; Mapeo et al 2001 Geol Magazine 138: 299-308; Singletary et al 2003 Precamb Res 121: 47-71
Usagaran-Tanzania	2050	1980	1930	70	50	2740-2030	2050	40	82000	0.00117143	0.15	0	0.8	0	0	0.05	0.075	0	0	0	0	0.045	0.12	9840	0.000140571	0.88	1	9840	1950-1880 collision is Bangweula block	5740	4100	0.07	0.05	Reddy et al 2003 Tectonophys 375: 101-123; Lenoir et al 1994 Jour. African Earth Sciences 19: 169-184; de Waele et al 2006 Precambrian Res 148: 225-256
Taltson	2100	1970	1930	130	40	2700-2500	240000	40	9600000	0.0738462	0.8	0	0.2	0	0	0	0.4	0	0	0	0	0	0.4	3840000	0.0295385	0.6	0.95	3648000		2.93647e+06	903529	0.305882	0.0941176	McNicoll et al 2000 Canadian Jour Earth Sciences 37: 1575-1596; De et al 2000 Precamb Research 102: 221-249
Glenburgh	2100	1965	1940	135	25	3500-2430	400000	40	16000000	0.118519	0.7	0	0.3	0	0	0	0.35	0	0	0	0	0	0.35	5600000	0.0414815	0.65	0.85	4760000		4725000	875000	0.295312	0.0546875	Johnson et al 2011 Precambrian Res 189: 239-262
Thelon	2050	1960	1910	90	50	2700-2500	110000	40	4400000	0.0488889	0.5	0	0.5	0	0	0	0.25	0	0	0	0	0	0.25	1100000	0.0122222	0.75	0.95	1045000		707143	392857	0.160714	0.0892857	McNicoll et al 2000 Canad Jour Earth Sci 37: 1575-1596
Lapland Granulite belt	2000	1920	1870	80	50	3000-2700	472500	40	18900000	0.23625	0.5	0.2	0.3	0	0	0	0.25	0.18	0	0	0	0	0.43	8.127e+06	0.101588	0.57	1	8.127e+06		5.00123e+06	3.12577e+06	0.264615	0.165385	Daly et al 2001 Precambrian Res 105: 289-314; Daly et al 2006 Geol Soc London Memoir 32: 579-598
Wopmay	2000	1900	1840	100	60		192700	40	7708000	0.07708	0.9	0.1	0	0	0	0	0.45	0.09	0	0	0	0	0.54	4.16232e+06	0.0416232	0.46	0.9	3.74609e+06	after 1840 continental margin changed to rift/passive margin	2.60145e+06	1.56087e+06	0.3375	0.2025	Bowring/Podosek 1989 Earth Planet Sci Lettrs 94: 217-230; Hildebrand et al 1987 Jour Volcanology Geotherm Research 32: 99-118; Hildebrand et al 2010 Geol Soc America Bull 122: 794-814
Angara	2000	1900	1850	100	50	3390-2600	537485	35	18811975	0.18812	0.2	0	0.8	0	0	0	0.1	0	0	0	0	0	0.1	1.8812e+06	0.018812	0.9	0.92	1.7307e+06	could be a continuation of Wopmay; accretionary events in Neoproterozoic	1.25413e+06	627066	0.0666667	0.0333333	Gladkochub et al 2006 Episodes 29: 169-174; Poller et al 2005 Precamb Res 136: 353-368
Sutam (Central Aldan)	2200	1900	1850	300	50	3100-2500	112000	40	4480000	0.0149333	0.7	0	0.2	0	0	0.1	0.35	0	0	0	0	0.09	0.44	1971200	0.00657067	0.56	0.78	1537536		1689600	281600	0.377143	0.0628571	Badredinov et al 2009 Doklady Earth Sciences 2009, 425: 235-238
Akitkan	2060	1900	1870	160	30	3100-2500	224000	40	8960000	0.056	0.5	0.1	0.4	0	0	0	0.25	0.09	0	0	0	0	0.34	3046400	0.01904	0.66	0.97	2955008		2.56539e+06	481011	0.286316	0.0536842	Donskaya et al 2009 Precambrian Res 170: 61-72; Larin et al 2006 Stratigraphy & Geol Correlation 14: 463-474
Cathaysia	1950	1890	1830	60	60	3000-2500	507500	40	20300000	0.338333	0.7	0.1	0.2	0	0	0	0.35	0.09	0	0	0	0	0.44	8932000	0.148867	0.56	1	8932000	rifting began 1800-1760	4466000	4466000	0.22	0.22	Yu et al 2009 Precamb Res 174: 347-363
Trans-North China	2200	1890	1850	310	40	2700-2500	308000	40	12320000	0.0397419	0.35	0.1	0.45	0	0	0.1	0.175	0.09	0	0	0	0.09	0.355	4373600	0.0141084	0.645	0.7	3061520		3873760	499840	0.314429	0.0405714	Trap et al 2011 Precambrian Res doi:10.1016/j.precamres.2011.09.008; Zhao et al 2007 Geological Mag 144: 753-775
Ubendian	2000	1880	1850	120	30	2700-2500	100000	40	4000000	0.0333333	0.1	0	0.8	0	0	0.1	0.05	0	0	0	0	0.09	0.14	560000	0.00466667	0.86	1	560000		448000	112000	0.112	0.028	de Waele et al 2006 Precambrian Res 148: 225-256; Collins et al 2004 Earth Planet. Sci. Lettr. 224: 175-192; Lenoir et al 1994 Jour. African Earth Sciences 19: 169-184
Lesser Himalaya	1950	1880	1780	70	100		303400	40	12136000	0.173371	0.8	0	0.2	0	0	0	0.4	0	0	0	0	0	0.4	4854400	0.0693486	0.6	1	4854400		1.99887e+06	2.85553e+06	0.164706	0.235294	Kohn et al 2010 Geol Society America Bull 122: 323-335
Mt Isa	1900	1875	1845	25	30	2530-2400	110000	40	4400000	0.176	0.8	0	0.2	0	0	0	0.4	0	0	0	0	0	0.4	1760000	0.0704	0.6	0.95	1672000		800000	960000	0.181818	0.218182	Cawood/Korsch 2008 Precamb Res 166: 1-38; Betts/Giles 2006 Precamb Res 144: 92-125
New Quebec	2170	1870	1815	300	55	3000-2500	160000	35	5600000	0.0186667	0.2	0	0.6	0	0	0.2	0.1	0	0	0	0	0.18	0.28	1.568e+06	0.00522667	0.72	0.75	1.176e+06		1.32507e+06	242930	0.23662	0.0433803	Machado et al 1997 Canadian Jour Earth Sciences 34: 716-723; Skulski et al 1993 Canad Jour Earth Sci 30: 1505-1520
Nagssugtoqidian	1920	1870	1840	50	30	3035-2740	25000	40	1000000	0.02	0.3	0	0.7	0	0	0	0.15	0	0	0	0	0	0.15	150000	0.003	0.85	0.95	142500		93750	56250	0.09375	0.05625	Connelly/Mengel 2000 Geol Soc America Bull 112: 747-763; van Gool et al 2002 Canadian Jour Earth Sciences 39: 665-686
Foxe	1900	1870	1850	30	20	2830-2700	250000	40	10000000	0.333333	0.45	0	0.5	0	0	0.05	0.225	0	0	0	0	0.045	0.27	2700000	0.09	0.73	1	2700000		1620000	1080000	0.162	0.108	Jackson/Berman 2000 Canadian Mineralogist 38: 399-421; Corrigan et al 2001 Geol Survey Canada Current Research 2001-C23
Aravalli	2200	1870	1850	330	20	3300-2500	96000	40	3840000	0.0116364	0.6	0	0.4	0	0	0	0.3	0	0	0	0	0	0.3	1152000	0.00349091	0.7	0.65	748800		1.08617e+06	65828.6	0.282857	0.0171429	Kaur et al 2011 Precambrian Res 187: 155-164; Kaur et al 2009 Gondwana Res 16: 56-71; Buick et al 2010 Lithos 120: 511-528
Torngat	1940	1869	1844	71	25	3000-2500	75000	35	2625000	0.0369718	0.8	0	0.2	0	0	0	0.4	0	0	0	0	0	0.4	1050000	0.0147887	0.6	0.95	997500		776562	273438	0.295833	0.104167	Funck et al 2000 Jour Geophys Res 105: 23403-420; Connelly 2001 Jour of Geology 109: 57-77
Cornian	2000	1865	1845	135	20		78000	40	3120000	0.0231111	0.6	0	0.4	0	0	0	0.3	0	0	0	0	0	0.3	936000	0.00693333	0.7	0.93	870480	Laurentia collision 1540; extension 1490-1370	815226	120774	0.26129	0.0387097	Cawood/Korsch 2008 Precamb Res 166: 1-38; Betts/Giles 2006 Precamb Res 144: 92-125; Black et al 2005 Austral Jour Earth Sciences 52: 385-401
TransHudson	1980	1850	1800	130	50	2525-2425	983400	40	39336000	0.302585	0.4	0.18	0.12	0.1	0.05	0.15	0.2	0.162	0	0	0.045	0.135	0.542	21320112	0.164001	0.458	0.98	2.08937e+07		1.53979e+07	5.92225e+06	0.391444	0.150556	Schneider et al 2007 Precamb Res 153: 65-95; Rayner et al 2005 Canad Jour Earth Sci 42: 635-657; Hollings/Ansdell 2002 GSA Bulletin 114: 153-168; Corrigan et al 2005 Canad Jour Earth Sci 42: 421-434; Machado et l 1990 Canad Jour Earth Sci 27: 794-802
Halls Creek	1900	1850	1820	50	30		105000	40	4200000	0.084	0.6	0.1	0.2	0	0	0.1	0.3	0.09	0	0	0	0.09	0.48	2.016e+06	0.04032	0.52	1	2.016e+06		1.26e+06	756000	0.3	0.18	Betts et al 2008 Precambrian Res 166: 81-92
Tanami	1870	1850	1830	20	20		55000	40	2200000	0.11	0.9	0	0.1	0	0	0	0.45	0	0	0	0	0	0.45	990000	0.0495	0.55	1	990000		495000	495000	0.225	0.225	Cawood/Korsch 2008 Precamb Res 166: 1-38; Betts/Giles 2006 Precamb Res 144: 92-125; Bagas et al 2008 Precambrian Res 166: 168-184
Yapungku	1860	1830	1760	30	70	3500-2500	500000	40	20000000	0.666667	0.5	0	0.5	0	0	0	0.25	0	0	0	0	0	0.25	5000000	0.166667	0.75	0.96	4800000		1500000	3500000	0.075	0.175	Cawood/Korsch 2008 Precamb Res 166: 1-38; Betts/Giles 2006 Precamb Res 144: 92-125
Tennant	1862	1825	1800	37	25		72000	40	2880000	0.0778378	0.8	0	0.2	0	0	0	0.4	0	0	0	0	0	0.4	1152000	0.0311351	0.6	0.89	1025280		687484	464516	0.23871	0.16129	Cawood/Korsch 2008 Precamb Res 166: 1-38; Betts/Giles 2006 Precamb Res 144: 92-125
Volyn Central Russian	1900	1800	1780	100	20	3700-2700	165000	40	6600000	0.066	0.8	0.1	0.1	0	0	0	0.4	0.09	0	0	0	0	0.49	3.234e+06	0.03234	0.51	0.85	2.7489e+06		2.695e+06	539000	0.408333	0.0816667
Kimban	1850	1740	1700	110	40	3500-2500	345000	40	13800000	0.125455	0.4	0.1	0.5	0	0	0	0.2	0.09	0	0	0	0	0.29	4.002e+06	0.0363818	0.71	0.85	3.4017e+06		2934800	1067200	0.212667	0.0773333	Cawood/Korsch 2008 Precamb Res 166: 1-38; Betts/Giles 2006 Precamb Res 144: 92-125; Hoek/Schaefer 1998 Austral Jour Earth Sciences 45: 305-313
Nimrod-Ross	1840	1730	1700	110	30	3100-2900	500000	40	20000000	0.181818	0.5	0	0.5	0	0	0	0.25	0	0	0	0	0	0.25	5000000	0.0454545	0.75	0.85	4250000		3.92857e+06	1.07143e+06	0.196429	0.0535714	Fitzsimons 2000 Geology 28: 879-882; Goodge/Fanning 1999 Geology 27: 1007-1010; Goodge et al 2001 Precamb Res 112: 261-288
Olarian	1700	1580	1540	120	40		500000	40	20000000	0.166667	0.5	0.05	0.4	0	0	0.05	0.25	0.045	0	0	0	0.045	0.34	6.8e+06	0.0566667	0.66	0.9	6.12e+06	Laurentia collision 1540; extension 1490-1370	5.1e+06	1.7e+06	0.255	0.085	Cawood/Korsch 2008 Precamb Res 166: 1-38; Betts/Giles 2006 Precamb Res 144: 92-125; Black et al 2005 Austral Jour Earth Sciences 52: 385-401
Kararan	1690	1570	1540	120	30		250500	40	10020000	0.0835	0.8	0	0.2	0	0	0	0.4	0	0	0	0	0	0.4	4008000	0.0334	0.6	0.8	3206400	area assumes Austral + Antarctica; Laurentia collision 1540; extension 1490-1370	3206400	801600	0.32	0.08	Cawood/Korsch 2008 Precamb Res 166: 1-38; Betts/Giles 2006 Precamb Res 144: 92-125
Albany-Fraser	1400	1330	1260	70	70	3000-2500	458700	40	18348000	0.262114	0.4	0	0.6	0	0	0	0.2	0	0	0	0	0	0.2	3669600	0.0524229	0.8	0.9	3302640	includes projection into Antarctica	1834800	1834800	0.1	0.1	Cawood/Korsch 2008 Precamb Res 166: 1-38; Betts/Giles 2006 Precamb Res 144: 92-125; Fitzsimons 2000 Geology 28: 879-882
Musgrave (Mt West)	1380	1345	1293	35	52		288300	40	11532000	0.329486	0.4	0	0.6	0	0	0	0.2	0	0	0	0	0	0.2	2306400	0.0658971	0.8	0.9	2075760		927862	1.37854e+06	0.0804598	0.11954	Cawood/Korsch 2008 Precamb Res 166: 1-38; Betts/Giles 2006 Precamb Res 144: 92-125
Penokean-Yavapai-Mazatzal	1900	1200	1150	700	50	Mojave (?)	2862400	40	114496000	0.163566	0.71	0.05	0.11	0	0.05	0.08	0.355	0.045	0	0	0.045	0.072	0.517	5.91944e+07	0.0845635	0.483	0.15	8.87916e+06		5.52481e+07	3.9463e+06	0.482533	0.0344667	Ibanez-Mejia et al 2011 Precamb Res 191: 58-77; Karlstrom et al 2001 Precamb Res 111: 5-30
Baltica (Svecofennian, Gothian)	1900	1140	970	760	170	3000-2700	2053669	40	82146760	0.108088	0.8	0	0.1	0	0.05	0.05	0.4	0	0	0	0.045	0.045	0.49	4.02519e+07	0.052963	0.51	0.2	8.05038e+06	Most action between 2000 and 1555	3.2894e+07	7.35788e+06	0.40043	0.0895699	Bingen et al 2005 Norwegian Jour Geology 85: 87-116; Lahtinen et al 2008 Episodes March 2008: 20-28; Mints 2011 Geotectonics 45: 267-290; Bingen et al 2008 Norwegian Jour Geology 88: 43-72
Xiong'er	1800	1125	1050	675	75		79250	40	3170000	0.0046963	0.8	0.1	0.15	0	0	0	0.4	0.09	0	0	0	0	0.49	1.5533e+06	0.00230119	0.51	0.2	310660	most of the action between 1800 and 1400	1.39797e+06	155330	0.441	0.049	He et al 2008 Lithos 102: 158-178; Huang et al. 2012 Lithos 134-135: 236-252
Makkovikian-Labradorian	1750	1100	980	650	120	3200-2700	2037600	40	81504000	0.125391	0.8	0	0.15	0	0	0.1	0.4	0	0	0	0	0.09	0.49	3.9937e+07	0.0614415	0.51	0.1	3.9937e+06		3.3713e+07	6.22394e+06	0.413636	0.0763636	Hynes/Rivers 2010 Canadian Jour Earth Sciences 47: 591-620; Fisher et al 2010 Geol Soc America Bull 122: 1646-1659
Amazonia (Rio Negro-Juruena, Ventuari-Tapajos)	2030	1100	1000	930	100	2600-2500	2263770	40	90550800	0.0973665	0.5	0	0.5	0	0	0	0.25	0	0	0	0	0	0.25	22637700	0.0243416	0.75	0.15	3395655	major cont arc collision 1340-1320;	2.04399e+07	2.19783e+06	0.225728	0.0242718	Bettencourt et al 2010 Jour South American Earth Sci 29: 28-46; Teixeira et al 2010 Jour South American Earth Sci 29: 47-60; Lamarao et al 2005 Jour South American Earth Sci 18: 277-292
Irumides	1100	1050	1000	50	50	2700-2500	111100	40	4444000	0.08888	0.75	0.05	0.2	0	0	0	0.375	0.045	0	0	0	0	0.42	1866480	0.0373296	0.58	0.95	1773156	EHf is most between 0 and+5 (at 1665-1630); three samples plot just below DM; a second population at 1600 Ma is between -2 and -8 (fig 4 De Waele et al 09)	933240	933240	0.21	0.21	De Waele et al 2009 Amer Jour Science 309: 132-187; de Waele et al 2006 Precambrian Res 148: 225-256
Arctic	1250	960	930	290	30	3000-2700	484750	40	19390000	0.0668621	0.4	0	0.5	0.1	0	0	0.2	0	0	0	0	0	0.2	3878000	0.0133724	0.8	0.65	2520700	onset of collision is uncertain because of Caledonian overprinting	3.51444e+06	363562	0.18125	0.01875	Strachan et al 1995 Jour Geol Society London 152: 779-784; Krane 2002 Precamb Res 113: 19-42; Lorenz et al 2012 Geological Magazine 149: 875-891
Namaqua-Natal	1300	1050	1000	250	50		687490	40	27499600	0.109998	0.7	0.1	0.15	0	0	0.05	0.35	0.09	0	0	0	0.045	0.485	13337306	0.0533492	0.515	0.8	1.06698e+07	most juvenile components in Natal domain	1.11144e+07	2.22288e+06	0.404167	0.0808333	Eglington 2006 Jour African Earth Sciences 46: 93-111
Kibaran	1420	1000	950	420	50		290400	40	11616000	0.0276571	0.75	0	0.25	0	0	0	0.375	0	0	0	0	0	0.375	4356000	0.0103714	0.625	0.5	2178000		3.8926e+06	463404	0.335106	0.0398936	Kokonyangi et al 2005 Geol Magazine 142: 109-130; Kokonyangi et al 2006 Jour African Earth Sci 46: 1-35; Buchwaldt et al 2008 Jour African Earth Sci 51: 4-20
Eastern Ghats	1100	1085	950	300	135		142300	35	4980500	0.0166017	0.6	0	0.4	0	0	0	0.3	0	0	0	0	0	0.3	1494150	0.0049805	0.7	0.6	896490	the whole area overprinted with Neoproteroz event	1.03045e+06	463702	0.206897	0.0931034	Mezger/Cosca 1999 Precamb Res 94: 251-271; Collins/Pisarevsky 2005 Earth-Science Revs 71: 229-270; Fitzsimons 2000 Geology 28: 879-882; Dasgupta et al 2012 Precamb Res doi:10.1016/j.precamres.2012.04.005
										0.143933

## Sheet: Nd isotopes 1
Nd isotopic data long-lived orogens (> 500 My)
	age (Ma)	Error	ENd (T)	TDM	references
Borborema	2330	10	0.4	2540	Fetter (1994) PhD Thesis Univ Kansas, p. 42-55
NE Brazil	2350	10	0.5	2460
	2300	20	1.5	2400
	2350	15	1.9	2380
	2350	10	1.5	2450
	2350	10	0.7	2470
	2110	12	0.7	2300
	2130	12	-0.6	2440
	2140	10	1.9	2270
	2100	8	1.9	2230
	2100	10	1.9	2220
	2100	10	0.2	2310
	2150	15	2.5	2220
	2100	10	-3	2540
	2200	10	1.2	2610
		mean & std	0.88	1.35762
Birimian-Transamazonian	2312	1	-2.9	2471	Gasquet et al 2003 Precamb Res 127: 329-543
Ivory Coast	2103	1	2.6	2109	Abouchami et al 1990 Jour Geophys Res 95: 17605-629
Dabakala area	2100	2	3.5	2047	Boher et al 1992 Jour Geophys Res 97: 345-369
	2118	2	3.7	2039
	2100	2	2.3	2123
	2100	2	2.8	2094
	2110	2	2.6	2110
	2108	2	2.9	2090
	2100	1	3.4	2053
	2162	32	1.8	2148
	2118	2	2.8	2091
	2102	11	3.4	2062
	2300	2	3.5	2047
	2103	1	2.7	2100
	2162	32	2.5	2150
Others	2100		3.1
	2100		2.3
	2100		2.6
	2105		3.2
	2110		2.9
	2090		3.4
	2085		2.8
	2075		3
	2086		2.9
	2092		2.9
	2084		3.8
	2100		3.6
	2142		3.3
	2116		4.1
	2115		3.4
	2109		2.7
	2113		2.4
	2104		3.2
	2087		2.4
	2096		2.2
	2099		3.3
	2108		3.9
	2108		3.4
	2105		2
	2110		1
	2095		2.6
	2084		0.9
	2077		1.7
	2089		2.6
	2092		1.5
	2092		3.2
	2100		4.1
	2132		1.8
	2116		2.6
	2115		2.2
	2108		0.5
	2104		2.8
	2133		2.1
	2152		2
	2088		1.7
	2075		2.3
	2069		2.4
	2058		-2
	2039		3.7
		mean & std	2.54407	1.21602
	2094	10	0.2	2325	Santos et al 2000 Gondwana Res 3: 453-488
Eburnean	2094	15	1.92	2202
	2096	12	1.94	2201
Cameroon	2089	15	1.87	2202
	2095	12	0.98	2313
	2090	14	1.9	2262
	2120	2	3.62	2073
	2120	12	1.2	2486
	2125	8	2.39	2207
	2130	20	1.82	2264
	2264	14	2.2	2382
	2110	12	2.65	2200
	2115	5	2.45	2226
	2114	6	3.08	2147
	2118	6	2.48	2212
	2115	10	2.12	2198
	2060	5	1.74	2227
	2065	6	-0.63	3054
	2062	8	-3.05	3213
		mean & std	1.62526	1.48439
	2100	5	-0.9	2440	Totue et al 2001 Precamb Res 108: 45-73
	2110	8	5.9	1830
	2105	9	0	2260
	2100	5	0	2260
Baltica	2108	4	-8.4	3150
	2110	8	-9.3	3020
Svecofennian Finland	2085	10	-10.4	3040
	2089	11	-12.4	3070
	2100	6	-5.4	2730
	2096	7	-0.5	2480
	2087	15	-7.2	2880
	2100	5	0.9	2370
	2105	18	4.1	2050
	2076	13	-4.9	2740
	2100	6	-4.8	2720
	2108	10	-4.9	2560
	2079	5	1.3	2190
	2100	5	-1.3	2360
	2096	26	-4.1	2550
	2114	12	-1.8	2600
	2115	21	6.9	1780
	2106	8	-3.2	2550
		mean & std	-2.74545	5.07081
	1922	12	2.6	2044	Lahtinen/Huhma 1997 Precamb Res 82: 13-34
	1923	12	1.2	2257	Huhma 1986 Geol Survey Finland Bull. 337: 1-48
	1920	12	1.1	2331	Andersen/Sundvoll 1995 Lithos 35: 235-243
	1925	10	1.4	2191
	1922	12	1.9	2131
	1914	4	3.1	1985
	1930	15	3	1976
	1932	12	2.7	1996
	1932	15	3.2	1977
	1930	15	2.6	2022
	1925	10	1.9	2214
	1921	2	3.4	1939
	1906	4	3.4	1936
	1882	2	-0.3	2310
	1886	5	2.9	1947
	1815	7	0.9	1973
	1816	10	0.8	1982
	1800		-6.9
	1880		-1.2
	1870		-3.4
	1870		-3.6
	1870		-2.1
	1880		-1.4
	1860		-6
	1830		0.1
	1890		-0.7
	1890		0.7
	1880		1.2
	1880		-0.2
	1890		-0.9
	1900		3.3
	1880		3
	1200		0.8
	1190		1.3
	1205		1.1
	1185		2
	1195		2.6
	1190		3.8
	1200		5.2
	1186		5.9
	1190		6.2
	1300		0.2
	1305		1.2
	1312		2
	1309		2.8
	1305		3.8
	1500		1
	1508		1.2
	1509		3
	1510		3.8
	1504		4.1
	1506		4.3
	1500		4.8
	1508		5.1
	1510		6
	1500		6.5
	1750		2.3
	1780		2.8
	1790		3
	1800		3.1
	1775		3.2
	1738		3.2
	1745		3.9
	1756		4
	1756		4.8
	1758		4.6
	1778		5
	1743		5.1
	1770		5.9
	1775		7.2
	1840		-0.1
	1845		-0.5
	1850		-0.6
	1873		-0.4
	1875		1.1
	1888		1.2
	1890		1.3
	1895		2.3
	1896		2.8
	1879		2.8
	1892		2.9
	1881		2.9
	1880		3.1
		mean & std	2.08795	2.55407
Telemark SG Norway	1190		1.7		Brewer/Menuge 1998 Chem Geol 145: 1-16
felsic/mafic volcanics	1180		1.7
	1185		1.7
	1195		1.7
	1196		1.6
	1191		1.5
	1185		1.2
	1174		1.4
	1175		-1.9
	1165		1
	1168		1.1
	1192		-0.8
	1198		1.1
	1191		-0.5
	1193		1.8
	1194		1.6
	1184		1.6
	1186		0.9
	1184		1.2
	1186		1.5
	1175		1.6
	1176		1.7
	1177		2
	1179		1.7
	1182		1
		mean & std	1.164	0.913273
Penokean-Yavapai-Mazatzal	2000	10	-6.7	2680	Geol Soc America Bull 101: 333-338
	1950	5	-8.6	2870
Penokean, Lake Superior region	1960	6	-8.6	2760
	2005	14	-11.7	3020
	1850	10	-10.8	3070
	1865	8	-8	3111
	1880	9	-7.9	3090
	1845	6	-6.6	2700
Tonalites, Taos Range	1869	8	1.3	2040
	1863	6	-0.9	2290
	1880	10	0.6	2040
	1890	5	0.5	2040
	1865	9	0.1	2140
	1880	10	0	2220
	1879	5	2.4	1980
	1890	9	3.3	1910
Paleoproterozoic SW USA	1860	7	0.8	2160
	1840	6	2.1	2110
	1900	12	0.4	2100
	1910	10	-2.2	2260
	1880	10	-2.4	2270
	1840	5	1.3	2010
	1860	6	0.7	2060
	1875	12	4	1850
	1860	6	3.9	1850
	1760	8	0.4	2090
	1889	9	-4.5	2470
	1846	7	1.1	2070
	1850	6	-2.2	2280
	1750		1.9
	1750		2.2
	1750		1.8
	1750		1.6
	1750		1.8
	1750		2.7
	1750		1.5
	1750		2.4
	1680		5.6
	1680		6.4
	1680		6
	1680		5.5
	1680		4.8
	1720		3.9
	1720		3.8
	1720		6.9
	1720		6.7
	1720		4.6
	1740		4.9
	1740		5.2
	1740		4.9
	1740		4.6
	1740		4.8
	1740		5.2
	1780		3.7
	1780		4.3
	1780		3.4
	1780		3.6
	1780		3.7
	1780		3.7
	1780		4.1
	1780		3.5
	1780		4.1
	1800		3.8
	1800		4.2
	1800		3.2
	1800		3.9
	1800		3.2
	1800		3.7
	1670		3.5
	1670		1.3
	1670		1.7
	1670		3.4
	1730		4
	1730		4.1
	1730		4.2
		mean & std	1.59733	4.18272
Usagaran-Tanzania	1920		-2.2		Maboko/Nakamura 1996 Precamb Res 77: 105-115
	1900		-4.2
	1910		-2.5
	1890		-4.2
	1895		-3.6
	1915		-3.3
	1910		-2.2
	1900		-2.7
	1923		-6.2
	1935		-5.3
		mean & std	-3.64	1.34924
Makkovikian-Labradorian
	1860	10	-6.3	2560	Kerr and Fryer 1994 Earth Planet Sci Lettrs 125: 71-88
Makkovik province, Canada	1865	14	-0.6	2380
	1810	9	0.1	2150
	1810	8	3.5	1940
	1800	4	-7.1	2710
	1810	15	-4.2	2390
	1785	6	-5.5	2850
	1825	11	-14.7	3170
	1785	6	-2.9	2350
	1800	10	-3.9	2560
	1750	11	-3.7	2390
	1820	10	2	2000
	1786	7	-3.5	2460
	1845	6	1.4	2020
	1840	9	2.7	2000
	1850	10	2.3	2010
	1855	8	1.2	2095
	1800	10	-2.3	2320
	1780	9	0.3	2140
	1814	6	-1.6	2260
	1849	12	0.5	2110
	1800	5	-4.9	2450
	1863	8	0.7	2080
	1823	9	0.5	2080
	1720	8	-4.7	2330
	1750	10	-2.5	2205
	1725	8	-3.8	2315
	1763	9	-7.8	2550
	1720	10	-5	2325
	1730	5	-1.1	2135
	1728	9	4.3	1775
	1757	5	4	1805
	1726	9	-0.3	2085
	1650	8	-0.3	2070
	1655	5	-0.1	1990
	1635	8	-1.5	2100
	1650	6	-7.1	2470
	1635	9	-1	2070
	1640	10	-5	2280
	1652	8	-4.3	2330
	1650	9	-1.4	2110
	1683	6	-2.4	2190
	1655	4	0.2	2190
	1647	6	-1.2	2110
	1673	10	-1.7	2140
	1653	10	0.1	2040
	1649	5	-3.9	2220
	1668	9	-1.4	2120
	1650	9	-2	2140
		mean & std	-1.95714	3.46536
Irumides	2042		-9.2		de Waele et al 2006 Precambrian Res 148: 225-256
	1942		-7.8
	1871		-2.6
	1871		-0.8
	1875		0
	1870		-3.1
	1856		-5
	1867		-4.4
	1879		-2.1
	1867		-3.4
	1860		-2.3
	1862		-5.9
	1872		-7
	1876		-4.3
	1638		-10
	1639		-8.8
	1030		-14.4
	1027		-15.2
		mean & std	-5.90556	4.32836
Kibaran	1329		-20.2		Buchwaldt et al 2008 Jour African Earth Sci 51: 4-20
	1328		-20.7
	1328		-20.3
	1322		-19.6
	1327		-20.2
	1363		-23
	1365		-22.2
	1360		-22.6
	1362		-2.31
	1364		-22.1
	1360		-22.6
	1444		-10.4
	1446		-1.4
	1443		-10.9
	1440		-10.1
	1447		-13.2
	1440		-10.5
	1395		-11.7
	1566		-10.4
	1565		-1.5
	1560		-11.6
	1562		-11.1
	1567		-10.9
	1560		-10.3
	1560		-10.1
	1566		-11.6
		mean & std	-13.9042	6.73313
Amazonia	1092		-3.9		Teixeira et al 2010 Jour South American Earth Sci 29: 47-60
	1095		-4.5		Lamarao et al 2005 Jour South American Earth Sci 18: 277-292
	1015		-4		Bettencourt et al 2010 Jour South American Earth Sci 29: 28-46
	1014		-3.1
	1076		-3.4
	1047		-4.4
	1070		-2.5
	1090		-0.5
	1110		4.3
	1115		2.3
	1098		-0.4
	1113		5
	1115		3.1
	1111		-1.5
	1114		-4.3
	1110		-3.9
	995		0.5
	993		-2.9
	989		-4.6
	978		1.3
	939		-7.1
	914		-7.6
	917		-5
	1880		-1.82
	1885		-2.45
	1882		-1.64
	1880		-0.72
	1890		-3.05
	1888		-2.47
	1889		-2.83
	1875		-2.26
	1881		-1.98
	1891		-5.21
	1895		-3.42
	1981		-2.35
	1983		-2.68
	1981		-1.76
	1988		-1.71
	1984		-1.03
	1998		-3.71
	2000		-2.21
	2021		-2.11
	2050		-1.1
	2010		-1.09
	1870		-6.57
	1875		-6.67
	1877		-5.73
	1872		-2.84
	1865		-1.37
	1866		-2.38
	1874		-2.04
	1900		-0.87
	1996		1.08
	1997		1.83
	1870		-12.1
	1875		-11.6
	1872		-10.1
	1886		-12.2
	1884		-9.7
	1871		-7.12
	1865		-0.5
	1864		-0.1
	1820		-0.8
	1920		1.37
	1925		-0.2
	1340		3.9
	1350		2.3
	1365		2.6
	1341		3.1
	1342		3.3
	1373		1.8
	1347		-3.7
	1372		1.2
	1365		1.1
	1364		-3.2
	1348		-3.5
	1356		-2.1
	1366		-1
		mean & std	-2.27577	3.60911
Xiong'er	1780		-7.42		He et al 2008 Lithos 102: 158-178
	1785		-7.78
	1789		-7.45
	1775		-6.8
	1784		-7.25
	1790		-7.23
	1776		-8.28
	1779		-7.28
	1782		-10
		mean & std	-7.72111	0.947331
Northeast Greenland	2000		-1.5		Kalsbeek et al 1993 Precamb Res 63: 163-178
	2042		-3.1
	2012		1.6
	2015		0.3
	2036		0.1
	2019		0.5
	2021		-8.7
	1995		1
	1998		-1.1
	1980		-0.5
	1985		-4
	1990		-2
	2001		-3.7
	2000		-0.2
	2014		-2.9
	2015		-1.3
	2010		-8
	2006		1.5
		mean & std	-1.77778	2.93168
Wopmay	1885		-1.07		Bowring/Podosek 1989 Earth Planet Sci Lettrs 94: 217-230
	1885		-1.84
	1883		-1.28
	1900		0.31
	1900		2.26
	1870		-0.19
	1870		-1.35
	1870		-0.23
	1870		-0.78
	1870		-0.83
	1865		-1.41
	1870		-1.63
	1870		-0.1
	1870		-1.13
	1875		-1.4
	1870		-1.35
	1870		0.09
	1870		-0.01
	1865		-8.59
	1865		-5.93
	1920		-1.67
	1920		0.25
	1920		2.81
		mean & std	-1.09	2.30294
Eastern Ghats	2500		-1.9		Rickers et al 2001 Precamb Res 112: 183-210
	2550		-4.9
	1000		-3.3
	2480		-5.4
	500		-16.2
	2490		2.4
	1600		-7.1
	1620		-6.5
	1610		-8.2
	1630		-7.9
	1625		-8.3
	1600		-4.7
	1602		-5.6
	1603		-6.5
	1605		-4.8
	1604		-5.1
	1614		-6.6
	2500		-3.6
	1000		-10.2
	1010		-9.6
	1012		-14
	1015		-10.8
	1035		-17.3
	1026		-16.5
	1024		-12.7
	1028		-12.4
	1039		-12.5
	1027		-9.9
	1100		-8.2
	1080		-7.7
	1060		-5.9
	1035		-6
	980		-5.2
	953		-6.4
	968		-4.2
	990		-2.5
	987		-5.5
	968		-5.8
	948		-8.1
	995		-14.7
	992		-17.3
		mean & std	-7.99024	4.45684
Musgrave	1300		-1		Wade et al 2008 Precamb Res 166: 370-386
	1350		-1.5
	1324		-2.3
	1336		-3
	1305		-4.2
	1310		-5
	1312		-5.4
	1309		-5.8
	1321		-6
	1325		-0.5
	1329		-0.79
	1360		-1.2
	1340		-1.5
	1328		-2.6
	1324		-2.8
	1333		-2.2
	1342		-3.1
	1350		-3.5
	1328		-3.6
	1305		-3.8
	1341		-4.1
	1332		-4.5
		mean & std	-3.10864	1.64323
Magondi-Kheis	1875		-2.2		Singletary et al 2003 Precamb Res 121: 47-71
	1950		-3.7
	1920		-1.1
	2000		2.2
	1880		-3.1
	1896		-3.5
		mean & std	-1.9	2.22621
					Eglington 2006 Jour African Earth Sciences 46: 93-111
Namaqua-Natal	1000		1.8
Namaqua segment	1200		0.01
	1152		0.2
	1148		0.03
	1050		-0.1
	1067		-0.2
	1054		-0.15
	1102		-1.2
	1152		-1.5
	1184		-2.2
	1154		-2.8
	1162		-2.4
	1102		-2.6
	1135		-4.8
	1064		-4.7
	1068		-5.2
	1072		-6.1
	1098		-6.8
	1021		-7
	1052		-7.5
	1043		-7.3
	1000		-7.8
	1003		-6.9
	1021		-8.2
	1009		-8.5
	1065		-9.1
	1101		-8.8
	1109		-8.8
	1112		-8.4
	1115		-9.3
	1141		-9.4
	1200		-8.4
	1198		-8.3
	1101		-8.25
		mean & std	-5.01941	3.60279
Natal segment	1000		3
	1051		3.2
	1048		3.4
	1020		2.5
	1028		2.2
	1035		2.1
	1036		2
	1025		1.5
	1006		1.8
	1015		1.7
	1115		1.4
	1100		0.5
	1095		0.6
	1087		0.8
	1054		0.01
	1023		-0.1
	1020		-0.2
	1009		0.5
		mean & std	1.495	1.13655
Angara	1900		-3.6		Gladkochub et al 2009 Geol Soc Lond Spec Public 323: 127-143
	1910		-3.9
	1905		-6.5
	1870		-5.4
	1875		-6.4
	1876		-3.1
	1868		-3.2
	1860		-1.5
	1750		-5.2
	1755		-4.7
	1860		-2.4
	1553		-5.6
	1965		2.7
	1862		-0.2
	1860		-8.3
	1866		-7.5
	1871		-7.4
	1855		-7.4
	1892		-9.8
	1875		-10.7
	1862		-7.7
	1860		-7
		mean & std	-5.21818	3.16719
Grenville Eastern Quebec	1227		5		McNutt/Dickin 2012 Terra Nova 24: 7-15
	1250		5.1
	1230		5.2
	1235		5.1
	1245		4.7
	1220		5.4
	1250		5.2
	1337		4.4
	1200		2.9
	1296		2.1
	1298		2.4
	1295		2.2
	1299		2.1
	1276		1.4
	1278		2.4
	1170		4.1
	1090		3.5
	1095		3
	1096		3.3
	1076		2.7
	1165		1.8
	1166		1.8
	1167		2.6
	1163		2.3
	1176		1.5
	1400		4.1
	1398		4
	1333		3.9
	1310		4.1
	1160		2.2
	1150		1.5
	1130		2.8
	1160		1.8
	1155		3
	1100		2.9
	1080		0.9
	1360		4
	1365		3.1
	1355		3.3
			5.4
		mean & std	3.17436	1.2462
Grenville Virginia	1030		0.1		McNutt/Dickin 2012 Terra Nova 24: 7-15
	1050		0
	1060		-0.5
	1065		-0.8
	1080		0.6
	1120		-0.2
	1125		0
	1140		0.1
	1160		-0.1
	1180		0.8
	1165		2.3
	1160		1.1
		mean & std	0.283333	0.825539

## Sheet: Nd isotopes 2
Nd isotopic data short-lived orogens (≤ 500 My)
TransHudson
	Age	ENd		References
	1800	-15.8	Western domains	Orrell et al 1999 Precamb Res 95: 187-223
	1800	-12.4	Western domains	Whalen et al 1999 Canad Jour Earth Sci 36: 227-250
	1800	-14.7	Western domains	Chauvel et al 1987 Canad Jour Earth Sci 24: 396-406
	1800	-5.6	Western domains
	1800	-3.2	Western domains
	1800	-11.9	Western domains
	1876	4.1	Western domains
	1849	4.2	Western domains
	1849	4	Western domains
	1849	4.9	Western domains
	1851	4.6	Western domains
	1881	2.2	Western domains
	1880	2	Western domains
	1893	3.3	Western domains
	1852	3.6	Western domains
	1863	-1.1	Western domains
	1870	-1	Western domains
	1865	-1.1	Western domains
	1860	-1.7	Western domains
	1863	-1.5	Western domains
	1866	-1.2	Western domains
	1852	-3.7	Western domains
	1856	-2.5	Western domains
	1885	3.62	Eastern domains
	1864	2.65	Eastern domains
	1858	4.09	Eastern domains
	1842	3.09	Eastern domains
	1880	3.45	Eastern domains
	1864	3.38	Eastern domains
	1847	3.47	Eastern domains
	1842	3.53	Eastern domains
	1906	-3.86	Eastern domains
	1886	4.5	Eastern domains
	1876	1.03	Eastern domains
	1853	3.77	Eastern domains
	1834	3.59	Eastern domains
	1875	4	Eastern domains
	1888	4.9	Eastern domains
	1876	1.8	Eastern domains
	mean & Std	0.064359	5.52883
Taltson-Thelon	2200	-5.2	Taltson	McNicoll et al 2000 Canad Jour Earth Sci 37: 1575-1596
	2150	-14.3	Taltson
	2160	-5.1	Taltson
	2300	-5	Taltson
	2320	-6	Taltson
	2301	-0.3	Taltson
	2235	-5.9	Taltson
	2248	-3.3	Taltson
	2160	-2.5	Taltson
	2340	-9.2	Taltson
	2380	-11.3	Taltson
	2345	-5	Taltson
	2210	3.9	Taltson
	2252	-12.5	Taltson
	2246	-1.8	Taltson
	2215	-4.2	Taltson
	2247	-1.6	Taltson
	2220	-4.3	Taltson
	2321	-4.7	Taltson
	2324	-1.7	Taltson
	2352	-12.3	Taltson
	2310	-5.7	Taltson
	2318	-9.9	Taltson
	2290	-8.6	Taltson
	2284	-0.9	Taltson
	2241	0.7	Taltson
	2200	-2.2	Taltson
	mean & Std	-5.14444	4.35716
New Quebec	1875	2.8	New Quebec	Skulski et al 1993 Canad Jour Earth Sci 30: 1505-1520
	1880	4.6	New Quebec
	1850	3.6	New Quebec
	1874	3.7	New Quebec
	1895	3.2	New Quebec
	1876	-3.1	New Quebec
	1855	3.4	New Quebec
	1848	4.1	New Quebec
	1886	3.4	New Quebec
	1894	4.8	New Quebec
	1885	2.8	New Quebec
	1896	4	New Quebec
	1864	5.2	New Quebec
	1867	4.3	New Quebec
	1894	4.6	New Quebec
	1876	3.8	New Quebec
	1855	2.1	New Quebec
	1920	-4.6	New Quebec
	1950	-7.1	New Quebec
	mean & Std	2.4	3.41549
Torngat	1900	-6.7		Theriault/Ermanovics 1997 Precamb Res 81: 15-35
	1906	-4.6
	1886	-0.4
	1876	3.8
	1853	0.5
	1890	2.8
	1875	-1.5
	1888	-0.2
	1880	-6.8
	1925	-1.5
	1935	-7
	1950	-8.5
	1944	-5.2
	1923	-6.1
	1908	-2
	1907	-2.3
	1910	-1.9
	1943	-2.4
	1926	-2.6
	1901	-2.2
	1885	-1.8
	1875	-7.2
	1883	-2.9
	1884	-7.8
	1905	-6
	1900	-4.6
	1903	-10.5
	mean & std	-3.54074	3.44476
Nagssugtoqidian	1920	-1.3		Whitehouse et al 1998 Precamb Res 91: 365-381
	1907	0.1
	1910	0.7
	1943	0.7
	1926	-3.4
	1925	0.5
	1900	-8.1
	1935	1.1
	1940	0.8
	1920	-2.5
	1922	-0.6
	1780	-8.7
	1800	-8.7
	1840	-6.1
	1770	-11.3
	2700	0.9
	2680	0.7
	2800	1
	2790	0.4
	2690	-1.6
	2700	-2.5
	2820	1.4
	2850	2.2
	2700	-0.8
	2800	-0.4
	2790	2
	2810	1.6
	2750	0.7
	1800	-9.5
	1840	-9.2
	mean & std	-1.99667	4.09394
Lapland	1920	3.8		Daly et al 2001 Precamb Res 105: 289-314
	1918	3.5
	1900	0.09
	1920	0.65
	1907	0.1
	1910	0.2
	1943	0.01
	1926	-1
	1925	-1.3
	1900	-1.8
	1935	-2.2
	1940	-2.4
	1900	-3
	1895	-3.2
	1906	-3.9
	1935	3
	1950	2.8
	1945	1
	1930	0.9
	1946	0.8
	1948	0.5
	1936	0.1
	1938	0.15
	1942	-0.2
	1945	-1.2
	1921	-1.9
	1928	-3
	1947	-3.2
	mean & std	-0.382143	2.09023
Volyn Central Russian	1900	1.8		Claesson et al 2001 Tectonophys 339: 1-18
	1900	-1.3
	1800	0.8
	1850	-0.5
	1850	0.9
	2000	2.7
	2000	3.3
	1900	2.1
	1950	-0.3
	1950	-1.2
	2010	1.5
	2023	2.4
	2042	1.8
	2010	-1.9
	mean & std	0.864286	1.64439
Volga-Don (Pachelma)	2096	2		Bibikova et al 2009 Statigraphy & Geological Correlation 17: 561-573
	2100	4		Shchipansky et al 2007 Geotectonics 41: 38-62
	2086	6
	2090	5
	2077	-1.4
	2080	-0.52
	2060	-0.68
	2090	-1.1
	2078	-1.2
	2014	0.48
	2022	0.3
	2005	0.8
	2017	0.42
	2102	5
	2109	-5.2
	2100	0.1
	2135	0.7
	2123	-4
	2096	6
	2098	3.6
	2097	3.1
	2099	2.4
	2100	2.2
	2102	1.3
	2078	-1
	2079	-2.4
	2077	-0.8
	2078	-1.2
	2085	-0.3
	2082	-1.1
	2800	-2.8
	2798	0.2
	2805	-4
	2795	-7.9
	2102	2.2
	2105	5.2
	2106	-5.3
	2111	2.5
	mean & std	0.331579	3.22721
Trans-North China	2100	-2.79		Li et al 2011 Jour Geol Society London 168: 1215-1224
	2105	-2.95
	2135	-3.89
	2124	-2.3
	2115	-5.66
	2089	-0.27
	2092	-6.69
	2084	-1.92
	2086	-1.7
	2079	-1.8
	2086	-0.32
	2093	-0.83
	2106	-3.44
	2111	-4.88
	2126	-2.29
	2128	-6.45
	2107	-4.17
	mean & std	-3.07941	1.98522
Sutam (Central Aldan)	1900	1.44
	1915	-5.04
	1924	-8.49
	1896	-15.2
	1894	-9.81
	1920	2.16
	1888	2.4
	mean & std	-4.64857	6.90401
Akitkan	1880	2.2		Gladkochub et al 2009 Geol Soc London 323: 127-143
	1879	-2
	1885	0.6
	1877	-3.3
	1890	-6.1
	1886	-7.6
	1880	-8.8
	1887	-3.8
	1850	-1.5
	1855	-1.8
	1856	-4.3
	1845	-6.3
	1859	-3.2
	1851	-1.7
	1855	-8
	1860	-4.6
	1856	-4.7
	1858	-4.9
	1860	-5.1
	1850	-1.6
	1854	-2
	1856	-7.1
	1850	-7.2
	1847	-2.4
	1855	-2.8
	1881	-4.8
	1843	-1
	1855	-3.2
	2020	1.8
	2021	1.3
	1855	-0.3
	2000	-1.1
	2050	-2.1
	1894	-6
	1860	2.2
	1865	-2
	1882	0.6
	1875	-3.3
	1869	-6.1
	1854	-7.6
	1855	-8.8
	1854	-3.8
	1848	-1.5
	1857	-1.8
	1850	-4.3
	1854	-6.3
	1847	-3.2
	1837	-1.7
	1839	-8
	1860	-4.6
	1865	-4.7
	1854	-4.9
	1872	-5.1
	1869	-5.1
	1842	-5.5
	1859	-7.5
	1855	-6.9
	1862	-6.9
	1855	-1.6
	1850	-2
	1856	-3.7
	1892	-5.2
	1823	-5.9
	1864	-6.3
	1857	-6.3
	1850	-9.2
	mean & std	-3.94545	2.80605
Aravalli	1822	-5.1		Kaur et al 2009 Gondwana Res 16: 56-71
	1820	-5.01		Kaur et al 2011 Precambrian Res 187: 155-164 (also has Hf isotopic data)
	1835	-4.98
	1800	-5.12
	1815	-4.8
	1820	-7.89
	mean & std	-5.5	1.18451
Glenburgh				Johnson et al 2011 Precambrian Res 189: 239-262 (Hf isotopic data)
Yapungku	1760	-5		Howard et al 2010 Precamb Res 184: 43-62
	1765	-4.2
	1762	-4
	1755	-3.7
	1758	-3.6
	1769	-3
	1754	-2.8
	1763	-2.2
	1766	-2.5
	1751	-1.5
	1764	-1.2
	1756	-0.5
	1759	-0.4
	1754	-0.1
	1765	0.5
	1780	-4.9
	1785	-4.3
	1786	-3.3
	1777	-3.2
	1779	-3
	1780	-3.2
	1775	-2.2
	1779	-2.1
	1785	-1.5
	1786	-1.3
	1792	-1
	1795	-0.9
	mean & std	-2.41111	1.49983
Kimban	1700	-3.8		Howard et al 2010 Precamb Res 184: 43-62
	1710	-3.8		Fraser et al 2010 Precamb Res 179: 1-21
	1720	-3.6
	1698	-3.9
	1673	-4.3
	1720	-7
	1730	-6.3
	1700	-6.8
	1743	-6.2
	1701	-6.3
	1712	-6
	1732	-5.2
	1726	-5.3
	1702	-5
	1741	-4.5
	1706	-3.5
	1730	-6.2
	1745	-5.5
	1740	-5
	1739	-4.8
	1740	-4
	1732	-3.3
	1728	-3
	1725	-9
	1732	-8.5
	1736	-7
	1720	-7.5
	mean & std	-5.38148	1.59833
Olarian	1600	-5.2		Payne et al 2006 Precamb Res 148: 275-291
	1650	-6.1		Barovich/Hand 2008 Precamb Res 166: 318-337
	1645	-6
	1603	-5.4
	1632	-4.5
	1620	-4.3
	1590	-4.4
	1587	-3.8
	1530	-4.6
	1565	-5.3
	1599	-7
	1600	-4.8
	1650	-1.4
	1655	-0.5
	1643	0
	1648	-1.8
	1659	-0.7
	1690	-4.9
	1678	-4.4
	1687	-3.9
	1695	-4.2
	mean & std	-3.9619	1.9464
Limpopo	2000	-9.2		Zeh et al 2007 Jour Petrology 48: 1605-1639
	2040	-9.5
	2050	-9
	2035	-8.8
	2036	-8.7
	2014	-8.2
	2018	-8
	2068	-7.6
	2054	-7.2
	2059	-7
	2034	-6.8
	2015	-6.4
	2001	-6.3
	2014	-6
	2026	-5.8
	2046	-5.2
	2089	-5
	mean & std	-7.33529	1.43001

## Sheet: Zircon ages
ZIRCON AGES COLLISIONAL OROGENS
	Syncollisional age	Subduction stage age	Syncollisional age	Subduction stage age	Ages from reworked components	References
	Wathaman, Rottenstone, LaRonge, Glennie		Eastern domains		> 1920 Ma
TransHudson	1860	1922	1906	1845	2615	Lewry et al 1987 Geol Soc London Spec Publ 33: 147-166
	1823	1874	1903	1847	2730	Orrell et al 1999 Precamb Res 95: 187-223
	1848	1876	1901	1858	2620	David/Syme 1994 Canad Jour Earth Sci 31: 1785-1790
	1863	1893	1886	1850	2630	Bickford et al 1994 Precamb Res 68: 1-21
	1850	1881	1880	1856	2518	Rayner et al 2005 Canad Jour Earth Sci 42: 635-657
	1850	1888	1889	1826	2497	Ansdell/Norman 1995 Precamb Res 72: 147-167
	1859	1885	1886	1837	2006
	1836	1867	1880	1842	2460
	1852	1879	1864	1838	2263
	1852	1882	1864	1834	2431
	1848	1879	1876	1831	2422
	1848	1880	1870	1837	2443
	1852	1849	1866	1807	2455
	1856	1852	1869	1819	2434
	1855	1876		1799	2580
	1830	1888		1801	2580
	1855	1881		1799	2587
	1853	1893			3117
	1837	1862
	1859	1866
	1855
	1834
	1853
	1825
	1825
	1808
	Domain areal percents from maps		1850-1800	1920-1850	> 1920
	Western domains	30	25	20	0
	Eastern domains	60	17	17	0
	Reworked margins	10	3	0	18	excluding monazite, Ar cooling ages, also excludes Sask craton since it is not exposed at surface
	weighted mean		18	16.2	1.8
	normalized to 100%		50	45	5
			45	37	18
	percents by number of ages		45	37	18
	Domain volume percents
	Western domains	25
	Eastern domains	48
	Reworked + Sask	27
	normalized to 100%		40	33	27	including Sask craton total assumed = to 27%
Taltson	1971	1986			3076	McNicoll et al 2000 Canad Jour Earth Sci 37: 1575-1596
	1962	1971			2562	McDonough et al 2000 Canad Jour Earth Sci 37: 1549-1573
	1959	2140			2335
	1963				2295
	1938				2393
	1934				2138
	1933				2330
	1936				2382
					3186
Thelon					2180	McNicoll et al 2000 Canad Jour Earth Sci 37: 1575-1596
					2300
					2333
					2490
New Quebec	1812	1873			2698	Machado et al Canad Jour Earth Sci 34: 716-723
	1813	1876			2707
	1819	1887			2690
	1806	1870
	1799	1883
		1870
		1940
Torngat		1910			2784	Scott/Machado 1995 Precamb Res 70: 169-190
		1895			2761	Connelly 2001 Jour Geology 109: 57-77
		1891			2784
		1890			2726
		1869			2751
		1864			2757
		1877
		1831
Nagssugtoqidian	1850	1900		2100	2740	Nutman et al 2008 Amer Jour Sci 308: 529-572
	1840	1920		2105	2750	Kalsbeek/Nutman 1996 Geology 24: 515-518
	1867	1890		2005	2800	Connelly/Mengel 2000 GSA Bulletin 112: 747-763
	1848	1900			2850
	1870	1910			3000
		1905			2700
		1880			2650
		1873			2750
		1874			3035
		1921			2727
		1913			2717
		1921			2728
					2666
					2812
					2874
					2850
					2840
					2778
					2787
					2765
					2753
					2731
					2814
					2763
					2693
					2717
					2498
Foxe	1897
	1869				2827	Wodlcka et al 2002 Geol Surv Canad Current Res 2002-F7
	1848				2719
					2738
					2720
Lapland	1910	1961			2722	Daly et al 2001 Precamb Res 105: 289-314
	1905	1944			2695
	1909	2031			2791
	1908	1994			2769
	1891	1979			2748
	1889	1972			2739
	1887	1970			2718
	1887	1964			2717
	1920	1960			2714
	1917	1960			2742
	1919	1950			2722
	1916	1950			2699
		1949			2689
		1940			2683
		1930			2673
Volyn Central Russian	1790	1935			2455	Claesson et al 2001 Tectonophys 339: 1-18
	1792	1853
	1787	1843
	1777	1871
		1858
		1857
		1855
		1856
		1833
		1828
		1940
		1852
		1846
		1959
		1954
		2065
		2024
		1956
		2162
		1810
		1816
Volga-Don (Pachelma)	2021	2096				Bibikova et al 2009 Statigraphy & Geological Correlation 17: 561-573
	2045	2104				Shchipansky et al 2007 Geotectonics 41: 38-62
	2022	2076
	2050	2060
		2080
		2078
		2096
		2102
Eburnean	2026	2126			2776	Lerouge et al 2006 Jour African Earth Sci 44: 413-427
	1985	2066			2800
	2016	2055			2836
	2044	2071			3113
	2045	2058			2576
	2015	2060			2483
	1987	2054			2753
	2004	2072			2789
	2035	2078			2833
	2028	2062			2752
	2019	2076			2538
	2007	2056			2761
	2017	2060
	2036	2050
	2017	2066
	1981	2073
	2016	2069
	2040	2059
	2043	2051
	1993	2062
	1986	2068
	2047
	2011
Birimian-Transamazonian	2070	2168			3378	Barbosa/Sabate 2002 Anais da Academia Baasileira de Cienacias 74: 343-359
	2000	2126			3384	Hirdes et al 1996 Precamb Res 80: 173-191
	2051	2152			3200
	2059	2151			3304
		2137			3335
		2104			3040
		2103			2695
		2104			2634
		2097			2689
		2110			2810
					2991
					3070
Trans-North China	1881	2132			2624	Li et al 2011 Jour Geol Society London 168: 1215-1224
	1850	2140			2617	Wilde et al 2001 Chinese Science Bull 49: 83-90
	1867	2076			2784	Zhao et al 2010 Precamb Res 177: 266-276
	1851	2077				Zhao et al 2007 Geol Magazine 144: 753-775
	1856	2138			2475
	1872	2084			2521
	1881	2178			2640
	1860	2184			2635
	1859	2154			2540
	1885	2097			2615
	1851	2051			2571
	1847	2184			2533
	1850	2135			2559
	1947	2095			2448
	1857	2179			2531
	1875	2100			2635
	1891	2358			2632
	1826	2330			2683
	1850	2113			2599
		2176			2560
		2117			2532
		2116			2756
		2084			2647
		2077			2511
		2045			2539
		1915			2545
		1914			2516
		2147			2556
		2180			2540
		2087			2635
		2097			2740
		2109			2540
		2097			2511
		2110			2522
		1946			2507
					2505
					2737
					2531
					2533
					2608
Sutam (Central Aldan)	1901	2220			3460	Frost et al 1998 Precamb Res 89: 1-23
	1918	2200			3100
	1850	2150			2950
	1875	1950			2660
					2540
Akitkan	1846				2884	Rosen et al 1994 in Condie KC, Archean Crustal Evolutuon p 411-459
	1908					Donskaya et al 2009 Precambrian Res 170: 61-72
	1910					Larin et al 2006 Stratigraphy & Geological Correlation 14: 463-474
	1890
	1866
	1861
	1863
	1835
	1880
	1854
Aravalli	1849	1854			2620	Roy/Kroner 1996 Geol Magazine 133: 333-342
	1840	1822			2666	Wiedenbeck et al 1996 Chem Geology 129: 325-340
	1864	2142			2887	Kaur et al 2011 Precambrian Res 187: 155-164
	1859	2179			2659
	1849	1899			3230
	1846	1890			2562
	1908	1893			2532
		1891			2505
		2212			2440
		2181			2506
					3281
					2795
					2675
					2503
					2521
					2663
					2668
					2530
					3234
					2625
					2465
Glenburgh	1952	1987			2555	Johnson et al 2011 Precambrian Res 189: 239-262
	1966	2002			2518
	1927	2001			2508
	1947	1999			2552
	1934	1994			2429
	1952	1989			2527
	1955	2006
	1944	2005
		2006
		2008
		2002
		1985
		1997
		2003
		1974
		1977
		2125
		2126
Halls Creek	1848	1910
	1847	1880				Sheppard et al 1999 Austral Jour Earth Sci 46: 679-690
	1863	1857
	1865	1870
	1856
	1850
	1845
Yapungku	1790	2015			2675	Bagas 2004 Precamb Res 128: 475-496
	1789	1972			2650	Halilovic et al 2004 Precamb Res 128: 343-366
	1787	1802			2655
	1778	1801			2658
	1775	1795			2659
	1765	1792			2677
	1777	1990			2678
	1769	2173			2665
	1792	1843			2672
		1850			3300
		2250			2800
		2200			2500
		2000			2650
		2027			2655
		2250			2950
		2060			2600
		1876			2650
		1796			2800
					2900
Kimban	1679	1745			2521	Bagas et al 2010 Precamb Res 177: 212-226
	1728	1774			2725
	1729	1780			2934
	1636	1780
	1637	1781
	1699	1782
	1733	1783
	1740	1785
		1788
		1790
		1795
		1795
		1798
		1859
		1771
		1775
		1778
		1780
		1781
		1784
		1789
		1795
		1802
		1806
		1807
		1789
		1790
		1794
		1795
		1795
		1800
Olarian	1555	1580				Preiss 2000 Precamb Res 100: 21-63
	1516	1584
	1539	1594
	1508	1600
	1560	1601
	1550	1602
	1548	1606
		1613
		1617
		1721
		1596
		1641
		1645
		1564
		1576
		1599
		1712
		1617
		1640
		1662
		1680
		1684
		1623
		1682
		1701
		1585
		1685
		1580
		1590
		1597
		1640
		1580
Limpopo	2014				3143	Zeh et al 2007 Jour Petrology 48: 1605-1639
	1943				2614	Gerdes/Zeh 2009 Chemical Geol 261: 230-243
	1989				2601
	2026				2651
	2019				2649
	2061				2612
	2058				2607
	2031				2612
					2647
					2614
					2929
					2711
Usagaran-Ubendian	2093	1921				De Waele/Fitsimons 2007 Precamb Res 159: 95-116
	2048	2000				Lenoir et al 1994 Jour African Earth Sci 19: 169-184
	2002	2000				Ring et al 1997 Precamb Res 85: 27-51
	2026	1999
	2084	1996
	2093	1991
	2002	1995
	2048	1998
		1961
		1979
		1949
		1942
		1927
		1902
		2009
		1988
		1995
